# Supplementary material for: The Economic Impacts and Management of Spotted Wing Drosophila (Drosophila Suzukii): The Case of Wild Blueberries in Maine
Source: Oxford University Press journal article supplement (doi:10.1093/jee/toz360), 2020-01-02
Supplement: toz360_suppl_supplementary-appendix.docx [file toz360_suppl_supplementary-appendix.docx]

**Appendix**

| Table A1. Expected revenues for selected benchmark fruit ripeness levels and average standard deviations (Avg SD) for the no-control strategy. | | | | | | | | | | | | |
| --- | --- | --- | --- | --- | --- | --- | --- | --- | --- | --- | --- | --- |
| Yield loss once infested | 10% |  |  |  | 30% |  |  |  | 50% |  |  |  | |
| Ripeness level | 60% | 75% | 90% | *Avg SD* | 60% | 75% | 90% | *Avg SD* | 60% | 75% | 90% | *Avg SD* | |
| **Price at $0.57/kg** |  |  |  |  |  |  |  |  |  |  |  |  | |
| No-control at low risk | $2,028 | $2,281 | $2,451 | *54.22* | $2,013 | $2,262 | $2,428 | *156.47* | $1,984 | $2,230 | $2,399 | *273.58* | |
| No-control at medium risk | $1,991 | $2,233 | $2,404 | *105.55* | $1,889 | $2,119 | $2,278 | *320.13* | $1,782 | $2,017 | $2,149 | *537.06* | |
| No-control at high risk | $1,937 | $2,176 | $2,333 | *123.04* | $1,719 | $1,969 | $2,093 | *369.65* | $1,535 | $1,727 | $1,805 | *614.66* | |
| Early harvest | $1,533 | $1,917 | $2,300 | *--* | $1,533 | $1,917 | $2,300 | *--* | $1,533 | $1,917 | $2,300 | *--* | |
| Insecticide application | $1,964 | $2,218 | $2,387 | *--* | $1,964 | $2,218 | $2,387 | *--* | $1,964 | $2,218 | $2,387 | *--* | |
|  |  |  |  |  |  |  |  |  |  |  |  |  | |
| **Price at $1.14/kg** |  |  |  |  |  |  |  |  |  |  |  |  | |
| No-control at low risk | $4,059 | $4,569 | $4,906 | *98.86* | $4,013 | $4,514 | $4,854 | *319.18* | $3,952 | $4,472 | $4,783 | *576.03* | |
| No-control at medium risk | $3,961 | $4,473 | $4,798 | *216.19* | $3,788 | $4,246 | $4,551 | *643.64* | $3,591 | $4,011 | $4,333 | *1053.98* | |
| No-control at high risk | $3,873 | $4,353 | $4,696 | *245.90* | $3,471 | $3,844 | $4,150 | *738.38* | $3,047 | $3,394 | $3,655 | *1231.54* | |
| Early harvest | $3,067 | $3,833 | $4,600 | *--* | $3,067 | $3,833 | $4,600 | *--* | $3,067 | $3,833 | $4,600 | *--* | |
| Insecticide application | $4,003 | $4,511 | $4,850 | *--* | $4,003 | $4,511 | $4,850 | *--* | $4,003 | $4,511 | $4,850 | *--* | |
|  |  |  |  |  |  |  |  |  |  |  |  |  | |
| **Price at $2.28/kg** |  |  |  |  |  |  |  |  |  |  |  |  | |
| No-control at low risk | $8,124 | $9,132 | $9,812 | *195.46* | $8,021 | $9,036 | $9,722 | *606.51* | $7,962 | $8,949 | $9,567 | *1152.05* | |
| No-control at medium risk | $7,945 | $8,917 | $9,626 | *414.83* | $7,507 | $8,445 | $9,143 | *1262.98* | $7,150 | $8,114 | $8,660 | *2110.93* | |
| No-control at high risk | $7,763 | $8,713 | $9,379 | *492.51* | $6,861 | $7,828 | $8,363 | *1478.56* | $6,102 | $6,894 | $7,468 | *2463.09* | |
| Early harvest | $6,133 | $7,667 | $9,200 | *--* | $6,133 | $7,667 | $9,200 | *--* | $6,133 | $7,667 | $9,200 | *--* | |
| Insecticide application | $8,082 | $9,098 | $9,777 | *--* | $8,082 | $9,098 | $9,777 | *--* | $8,082 | $9,098 | $9,777 | *--* | |
| Note: The reported standard deviations are averaged from all iterations with ripeness level from 60% and beyond. | | | | | | | | | | | | |

| Table A2. Sensitivity analysis with a higher cost of insecticide application at $197.7/hectare ($80/acre). | |
| --- | --- |
|  | Optimal management strategy |
| Low risk | No-control if fruit ripeness ≤ 98%, harvest otherwise |
| Medium risk | Apply insecticide if fruit ripeness ≤ 93%, harvest otherwise |
| High risk | Apply insecticide if fruit ripeness ≤ 93%, harvest otherwise |
| Note: Assumed price at $1.14/kg and 30% yield loss if infested. | |
